# Supplementary material
Source: publisher site journal article supplement (https://www.dovepress.com/article/221436)
Supplement: Supplementary file 1 [file get_supplementary_file.php]

**Supplementary material**


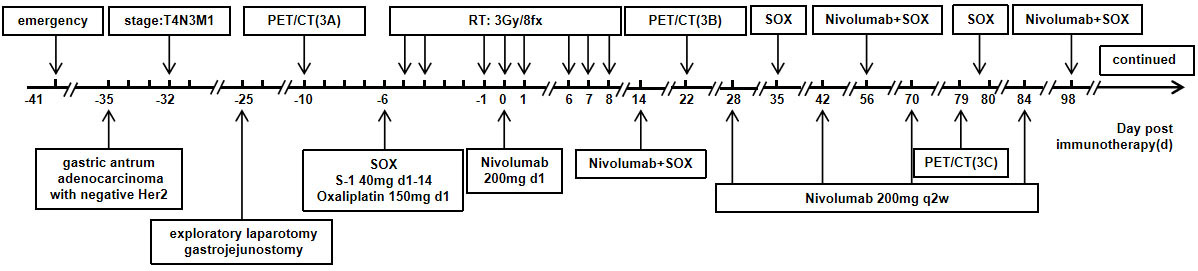


**Supplemental Figure 1.** The timeline of the patient’s treatments and the duration of each treatment.

**Notes:** SOX chemotherapy: S-1 40mg d1-14+Oxaliplatin 150mg d1 q3w; Nivolumab 200mg d1q2w; Radiotherapy (RT): 3Gy/8fx; All treatments were performed simultaneously. Six rounds of SOX chemotherapy were completed, followed by the maintenance of immune monotherapy.
